# Supplementary material for: Proanthocyanidins and Phenolic Compounds from the Twigs of Salix chaenomeloides and Their Anti-Lipogenic Effects on 3T3-L1 Preadipocytes
Source: MDPI journal article supplement (doi:10.3390/nu16071036), 2024-04-02

## **Supplementary Materials**

---

### Supporting Information Contents:

|                                                                                                                  |     |
|------------------------------------------------------------------------------------------------------------------|-----|
| <b>Figure S1.</b> The LC-UV chromatogram at 210 nm, UV spectrum and negative-ion mode MS data of <b>1</b> .....  | S3  |
| <b>Figure S2.</b> The $^1\text{H}$ NMR spectrum of <b>1</b> ( $\text{CD}_3\text{OD}$ , 850 MHz) .....            | S4  |
| <b>Figure S3.</b> The LC-UV chromatogram at 210 nm, UV spectrum and negative-ion mode MS data of <b>2</b> .....  | S5  |
| <b>Figure S4.</b> The $^1\text{H}$ NMR spectrum of <b>2</b> ( $\text{CD}_3\text{OD}$ , 850 MHz) .....            | S6  |
| <b>Figure S5.</b> The LC-UV chromatogram at 254 nm, UV spectrum and negative-ion mode MS data of <b>3</b> .....  | S7  |
| <b>Figure S6.</b> The $^1\text{H}$ NMR spectrum of <b>3</b> ( $\text{DMSO}$ , 850 MHz) .....                     | S8  |
| <b>Figure S7.</b> The LC-UV chromatogram at 210 nm, UV spectrum and negative-ion mode MS data of <b>4</b> .....  | S9  |
| <b>Figure S8.</b> The $^1\text{H}$ NMR spectrum of <b>4</b> ( $\text{DMSO}$ , 850 MHz) .....                     | S10 |
| <b>Figure S9.</b> The LC-UV chromatogram at 210 nm, UV spectrum and negative-ion mode MS data of <b>5</b> .....  | S11 |
| <b>Figure S10.</b> The $^1\text{H}$ NMR spectrum of <b>5</b> ( $\text{CD}_3\text{OD}$ , 850 MHz) .....           | S12 |
| <b>Figure S11.</b> The LC-UV chromatogram at 210 nm, UV spectrum and negative-ion mode MS data of <b>6</b> ..... | S13 |
| <b>Figure S12.</b> The $^1\text{H}$ NMR spectrum of <b>6</b> ( $\text{CD}_3\text{OD}$ , 850 MHz) .....           | S14 |

**Figure S1.** The LC-UV chromatogram at 210 nm, UV spectrum and negative-ion mode MS data of **1**

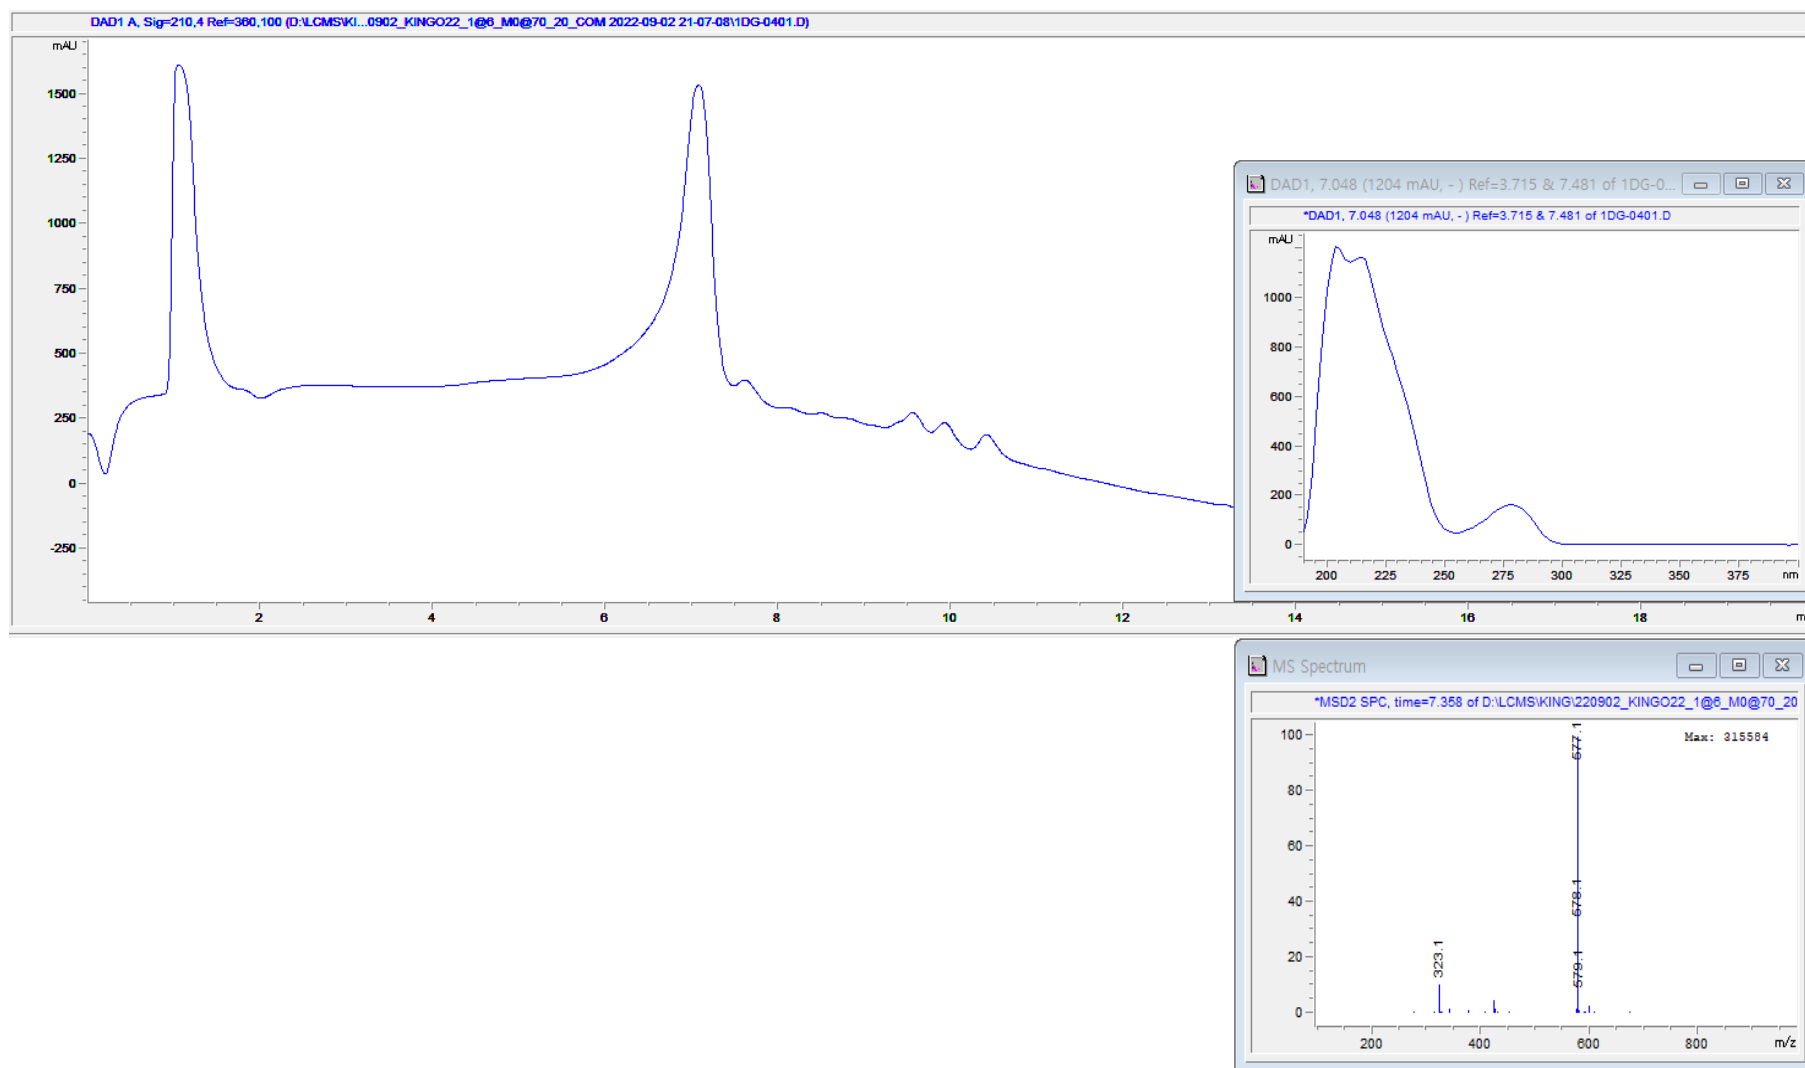

**Figure S2.** The  $^1\text{H}$  NMR spectrum of **1** ( $\text{CD}_3\text{OD}$ , 850 MHz)

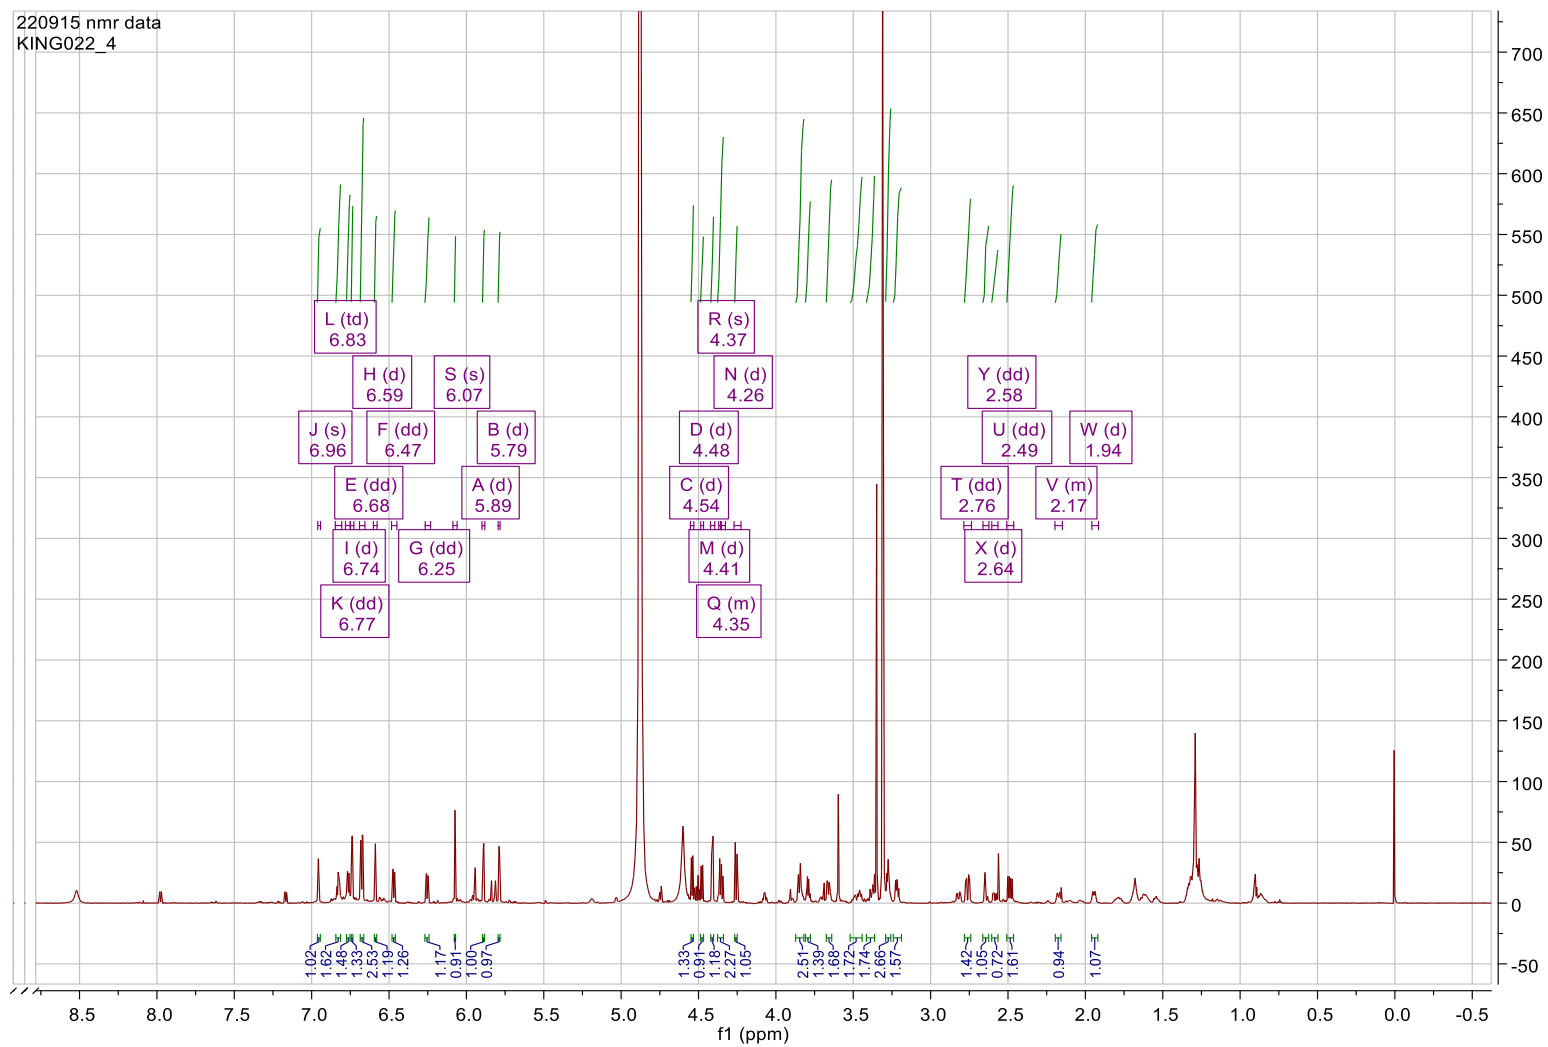

**Figure S3.** The LC-UV chromatogram at 210 nm, UV spectrum and negative-ion mode MS data of **2**

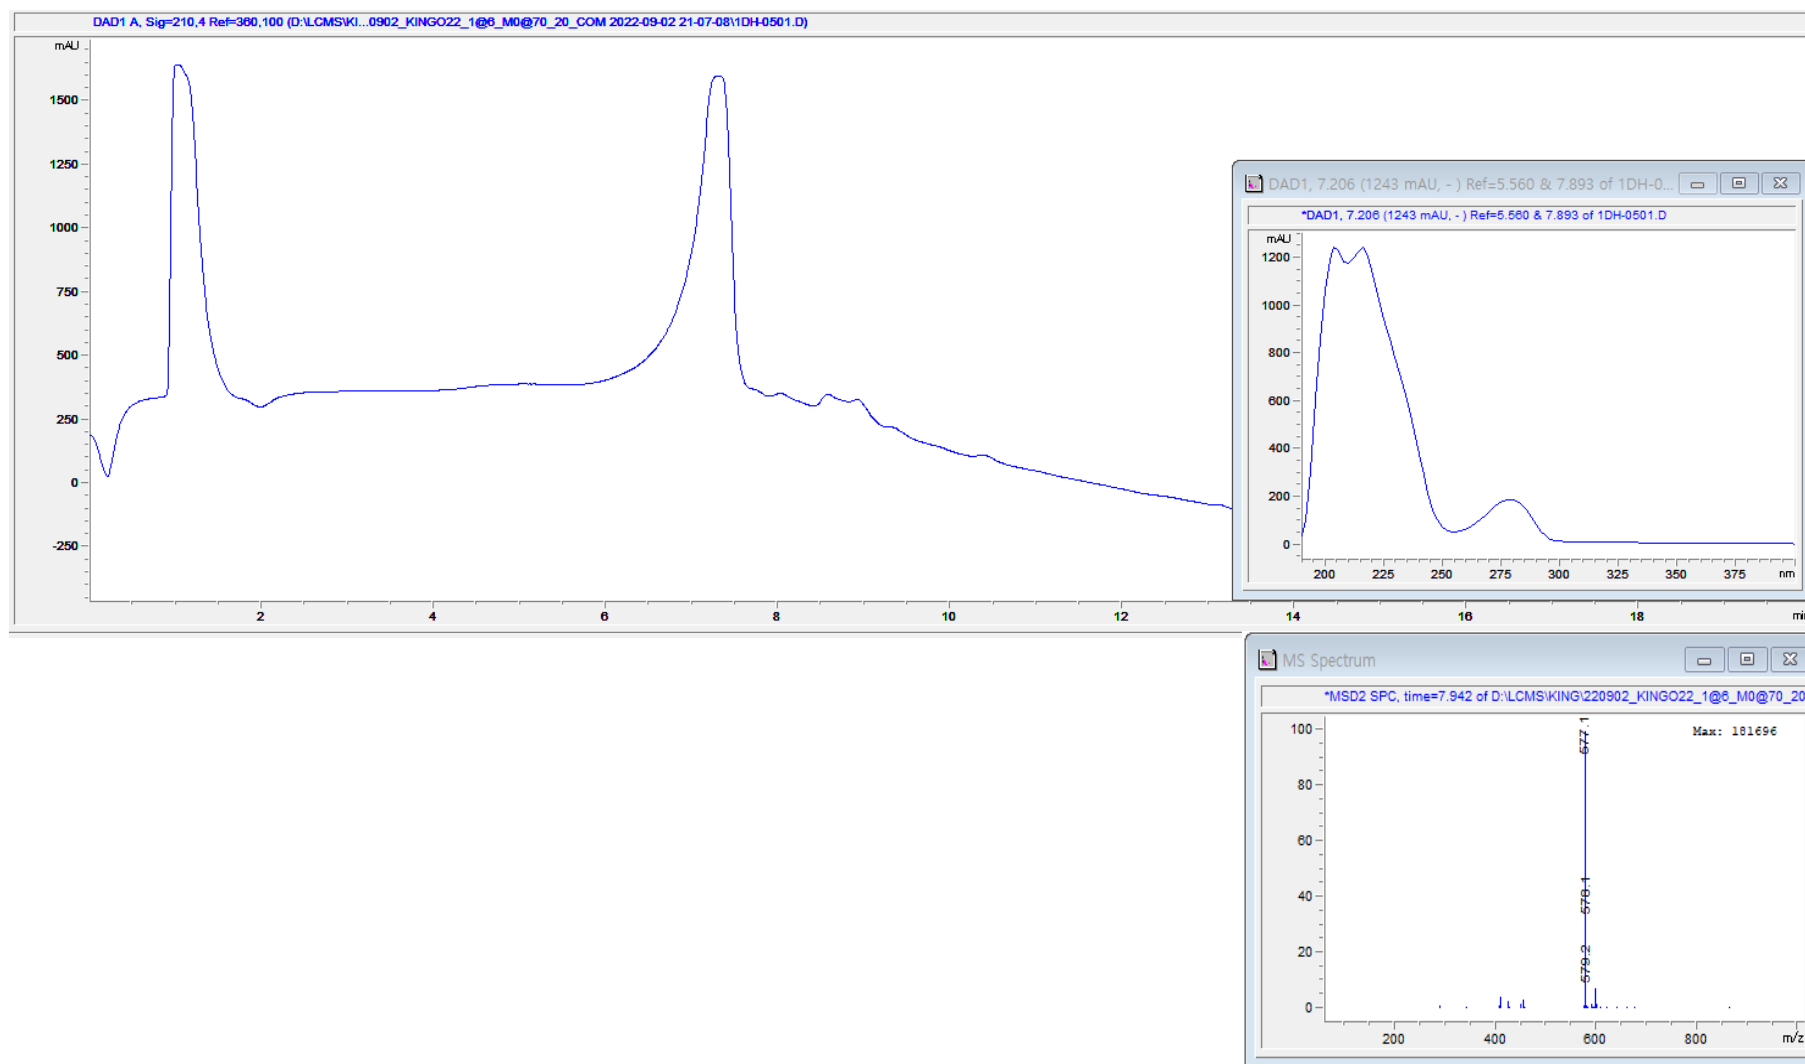

**Figure S4.** The  $^1\text{H}$  NMR spectrum of **2** ( $\text{CD}_3\text{OD}$ , 850 MHz)

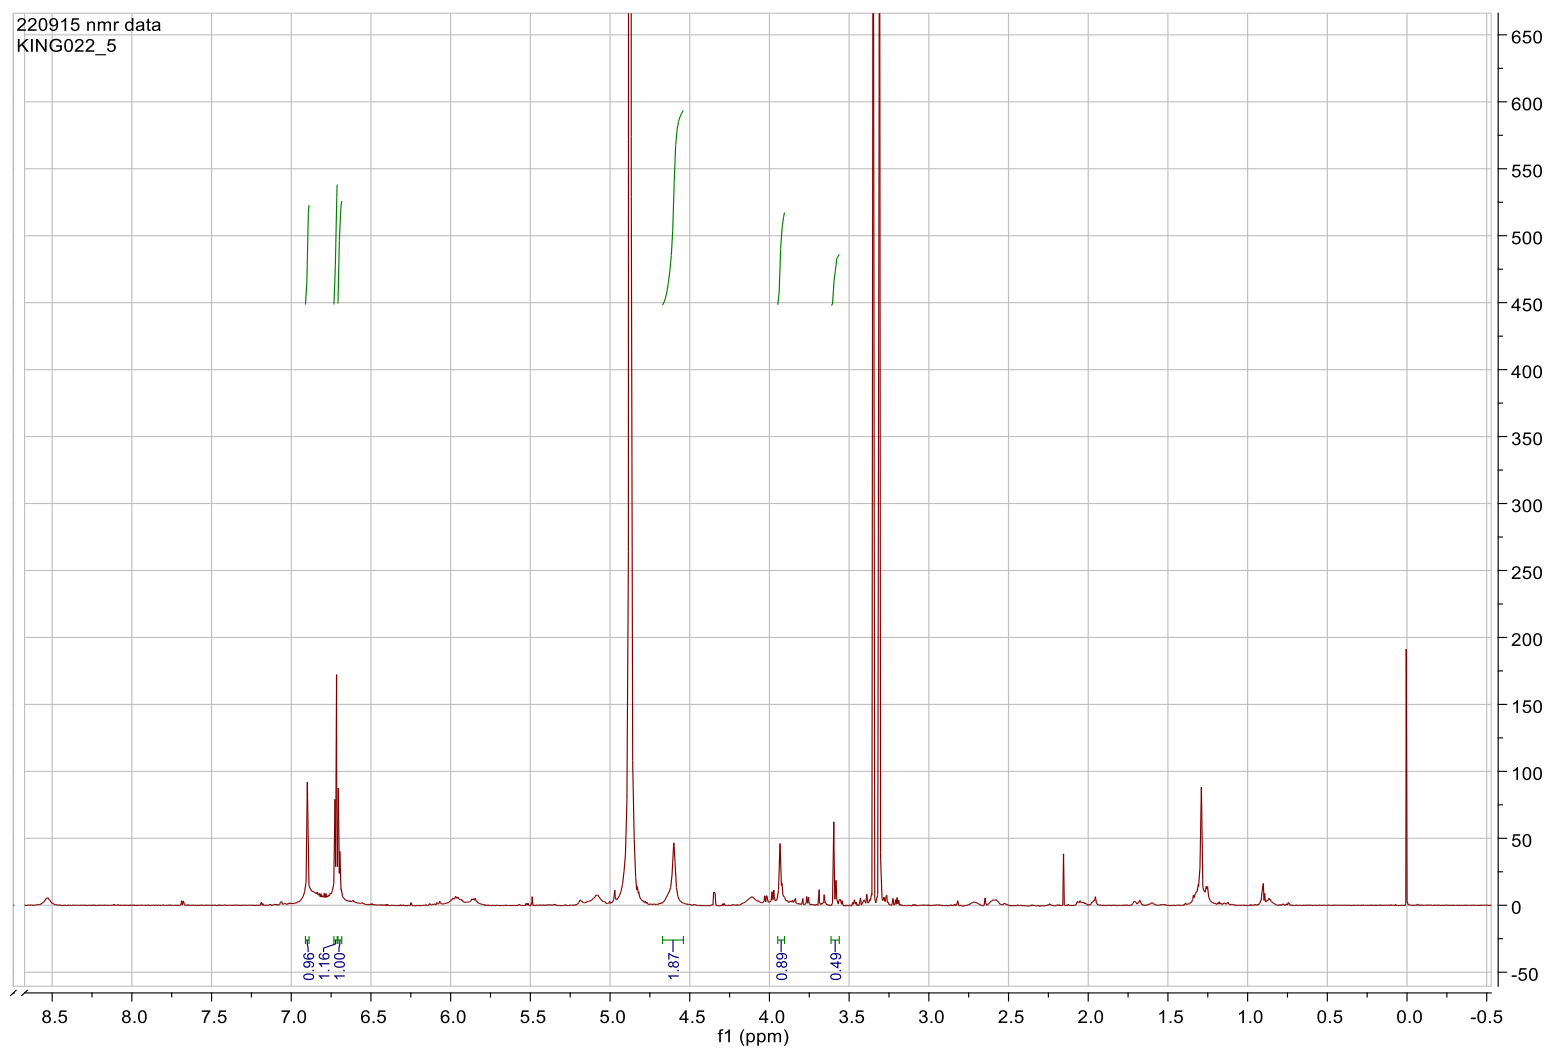

**Figure S5.** The LC-UV chromatogram at 254 nm, UV spectrum and negative-ion mode MS data of **3**

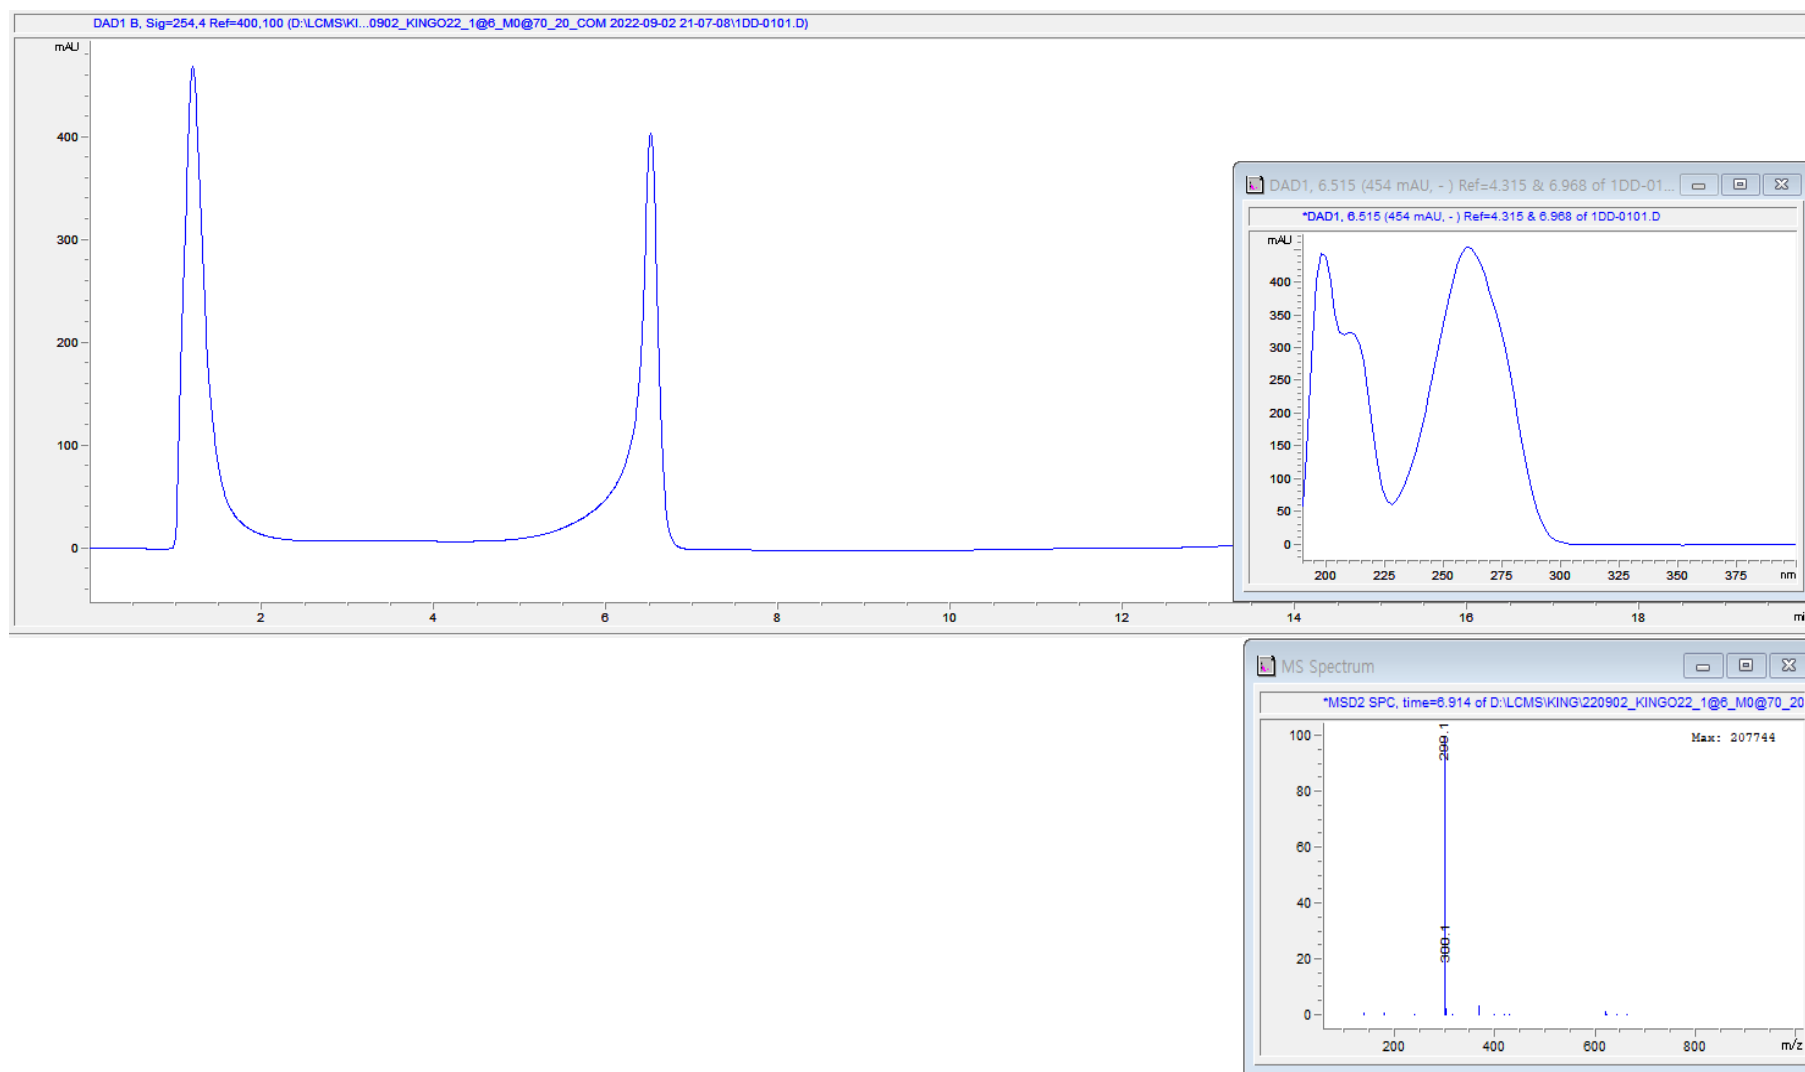

**Figure S6.** The  $^1\text{H}$  NMR spectrum of **3** (DMSO, 850 MHz)

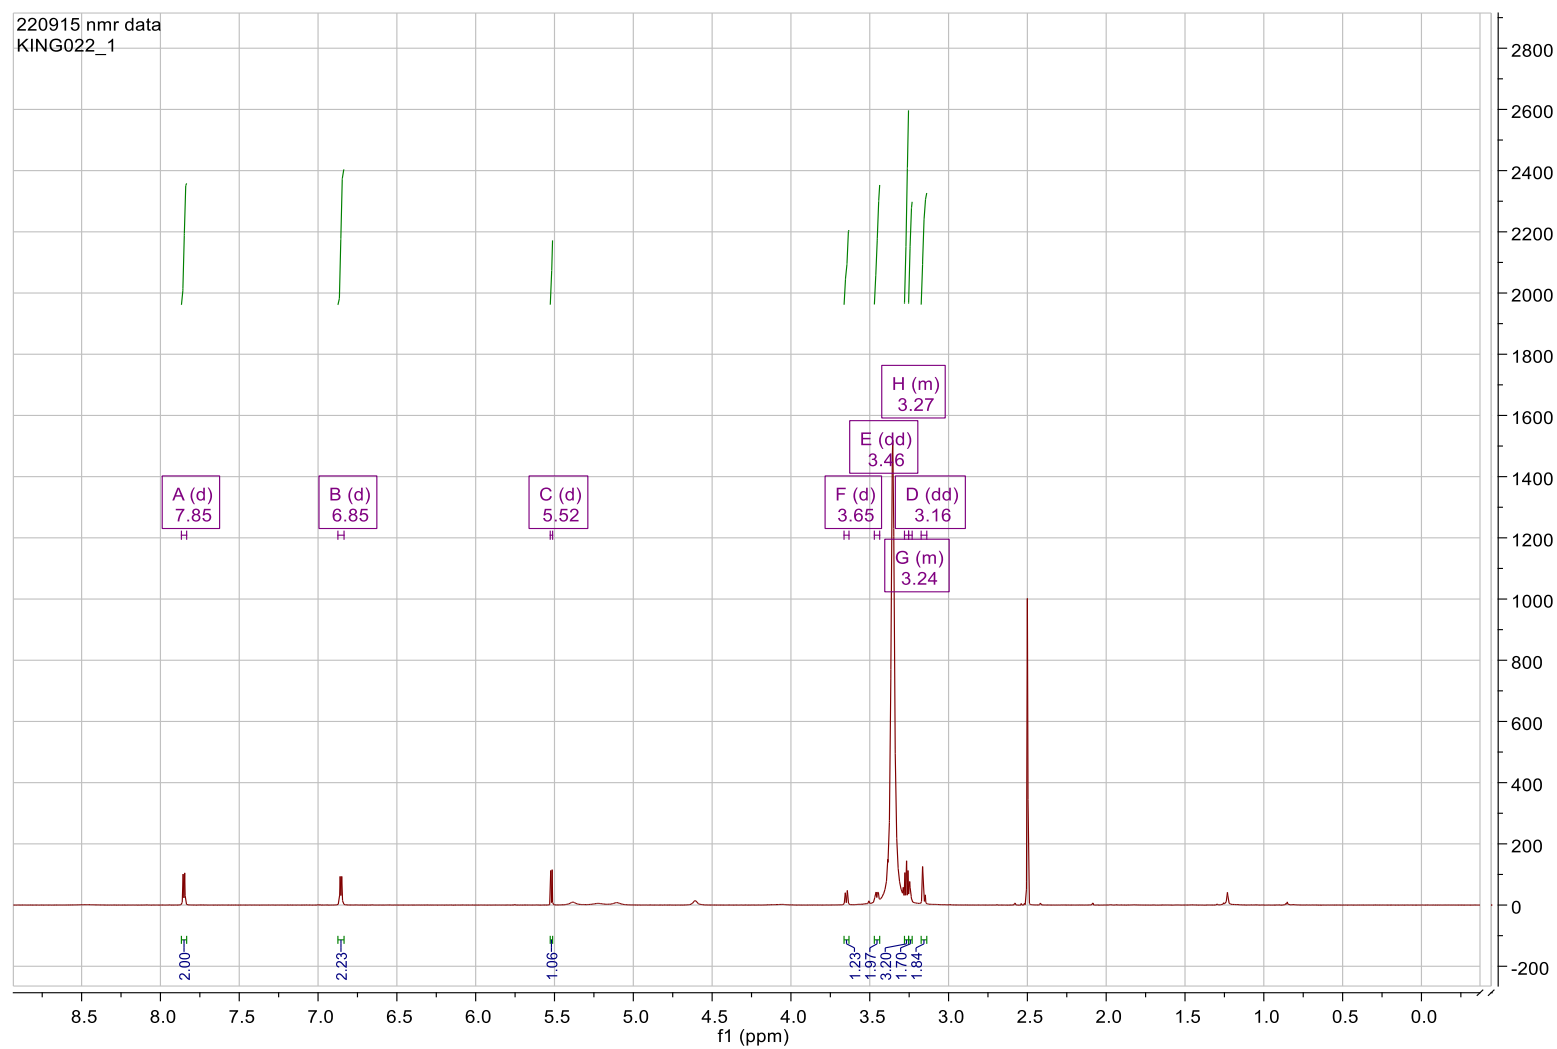



**Figure S7.** The LC-UV chromatogram at 210 nm, UV spectrum and negative-ion mode MS data of **4**

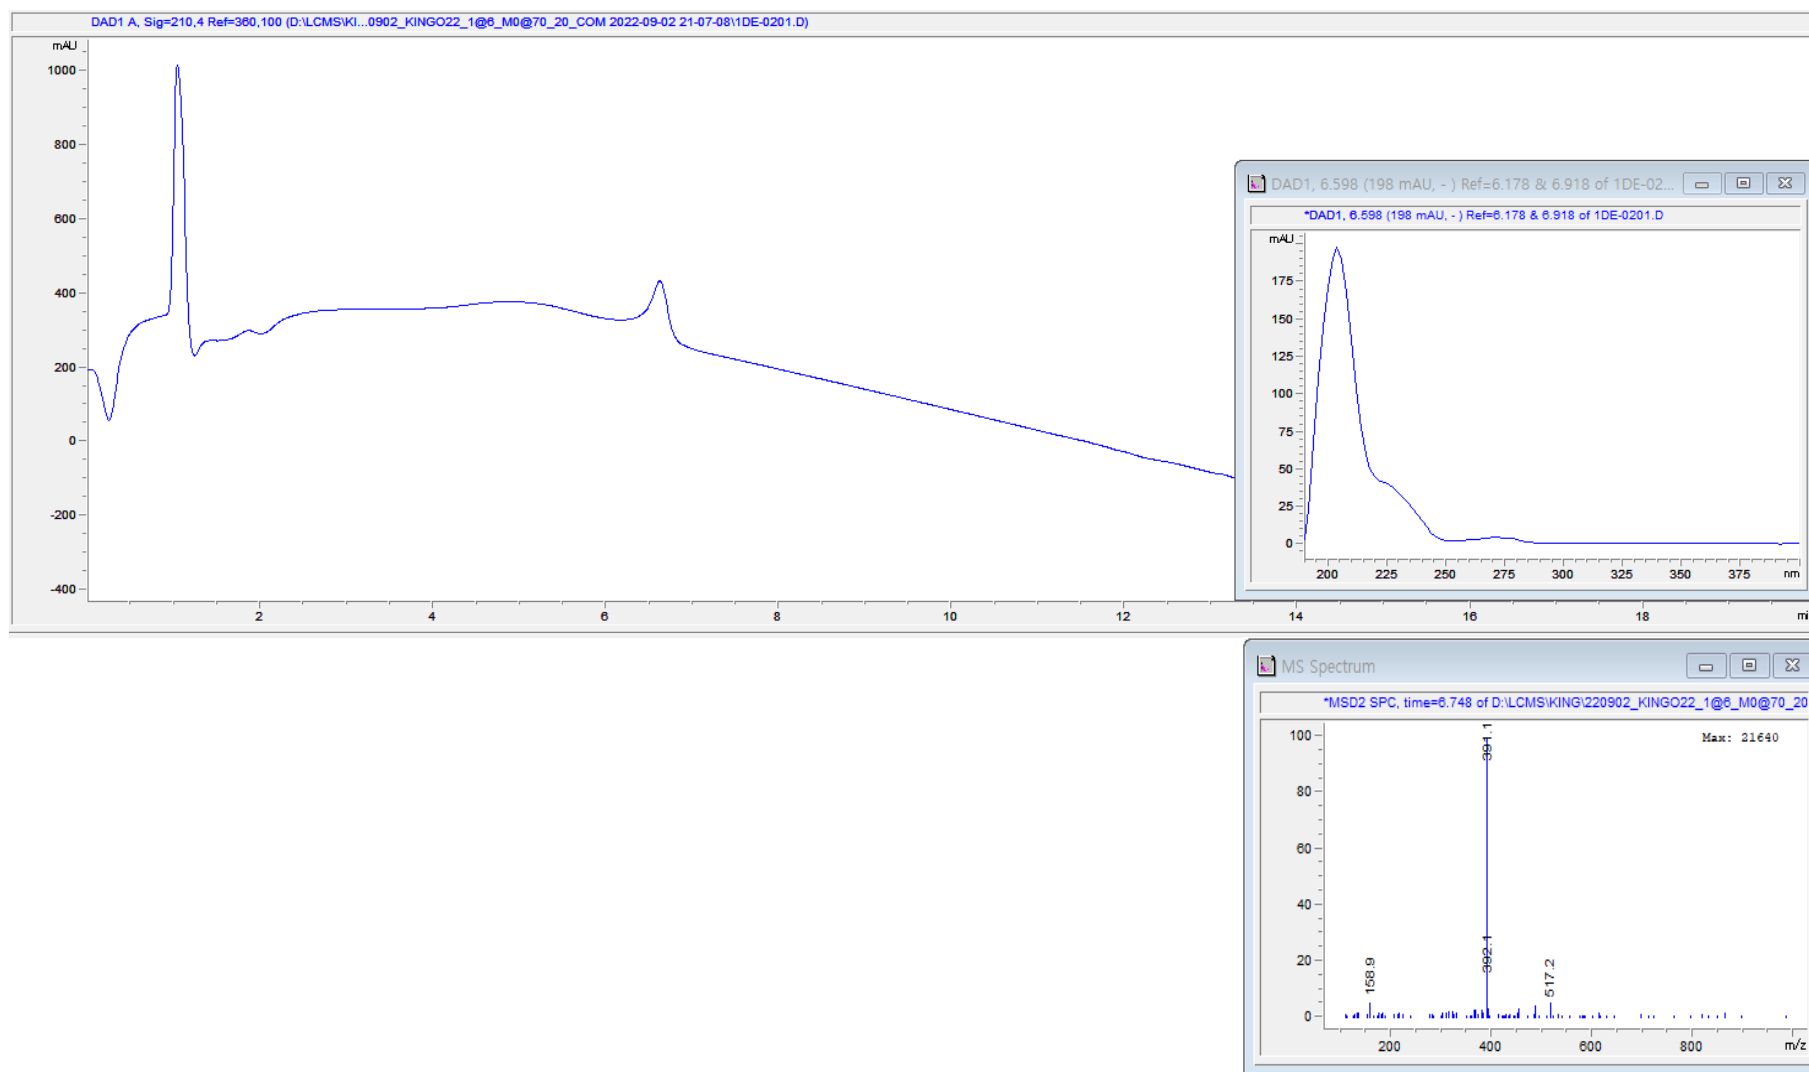

**Figure S8.** The  $^1\text{H}$  NMR spectrum of **4** (DMSO, 850 MHz)

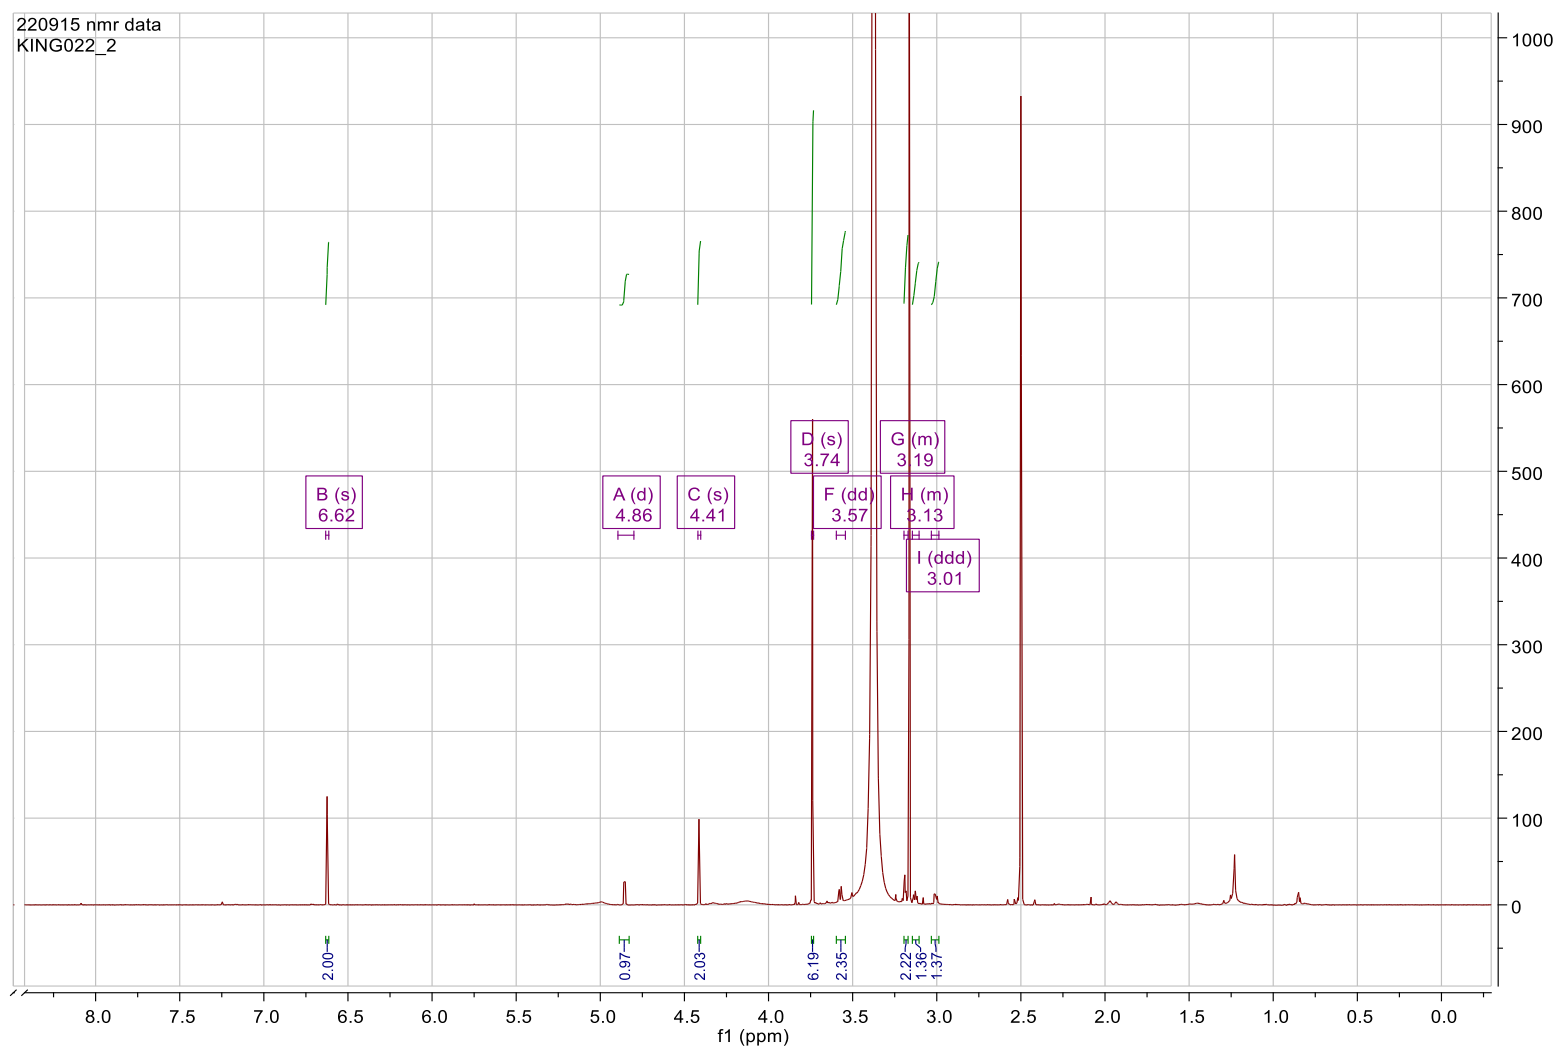

**Figure S9.** The LC-UV chromatogram at 210 nm, UV spectrum and negative-ion mode MS data of **5**

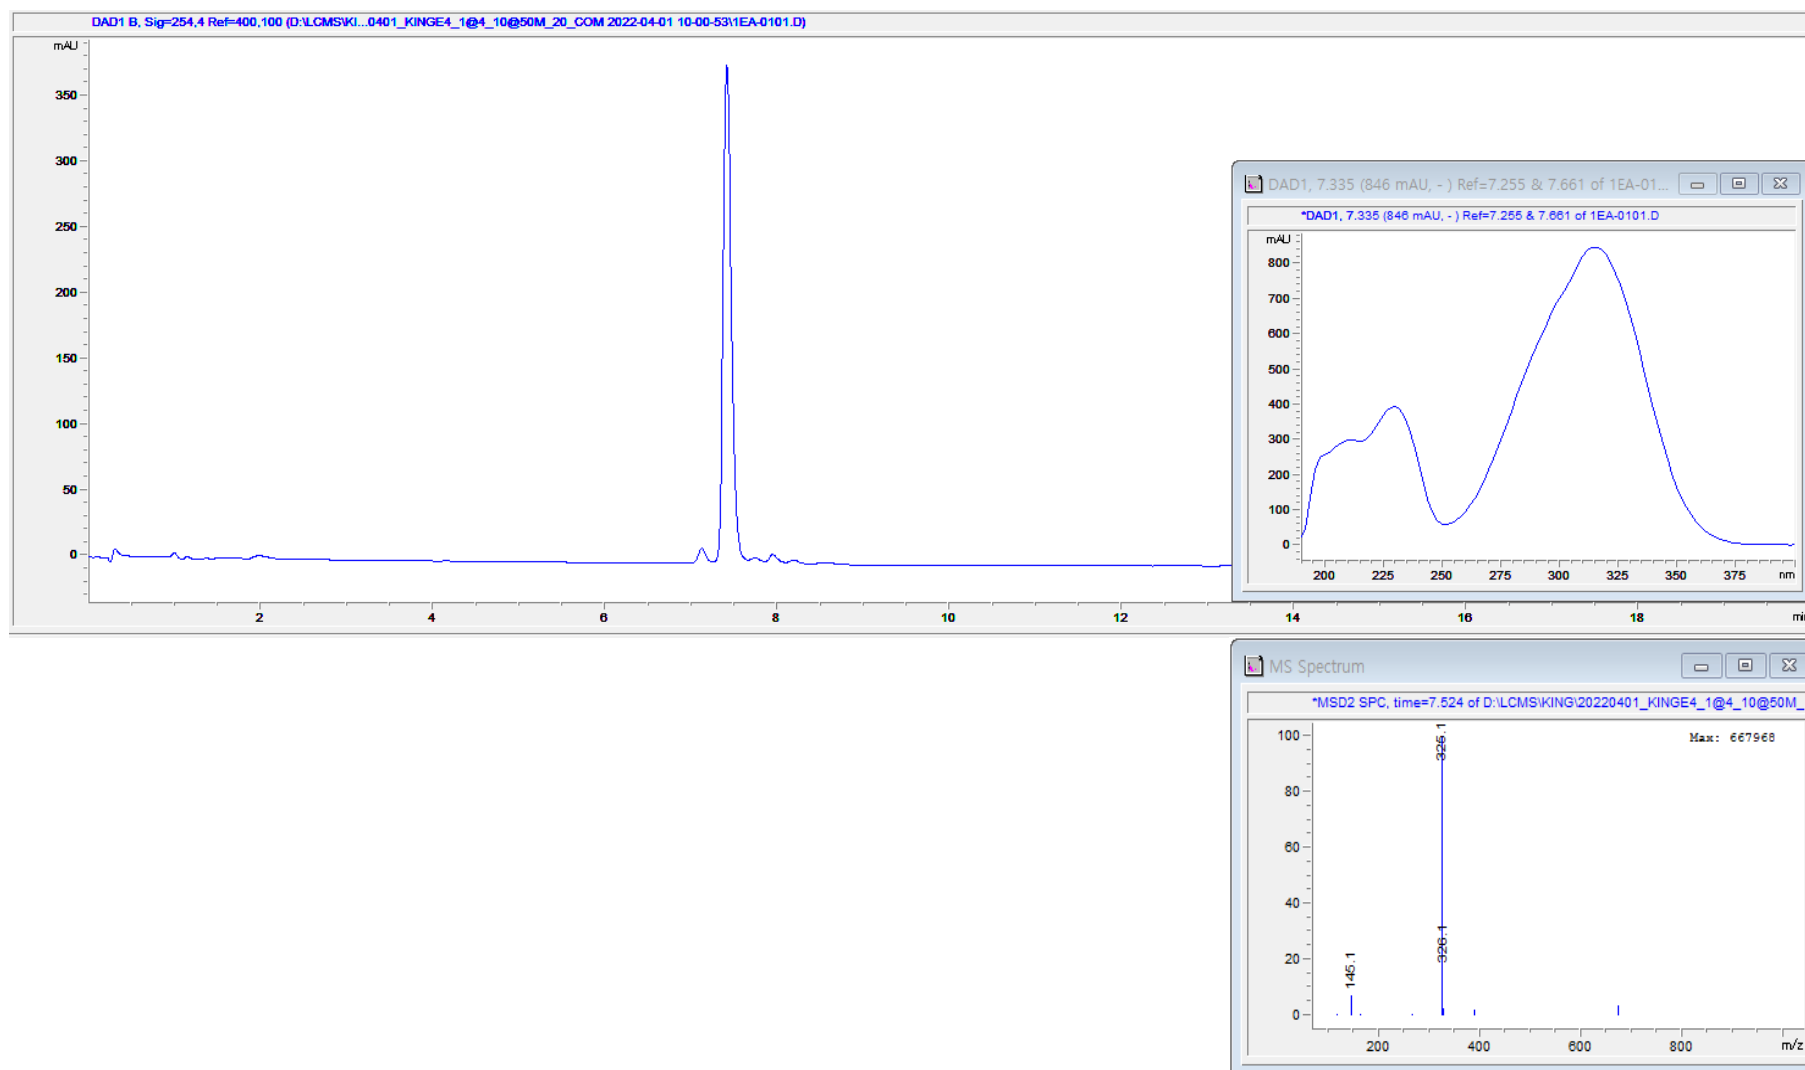

**Figure S10.** The  $^1\text{H}$  NMR spectrum of **5** ( $\text{CD}_3\text{OD}$ , 850 MHz)

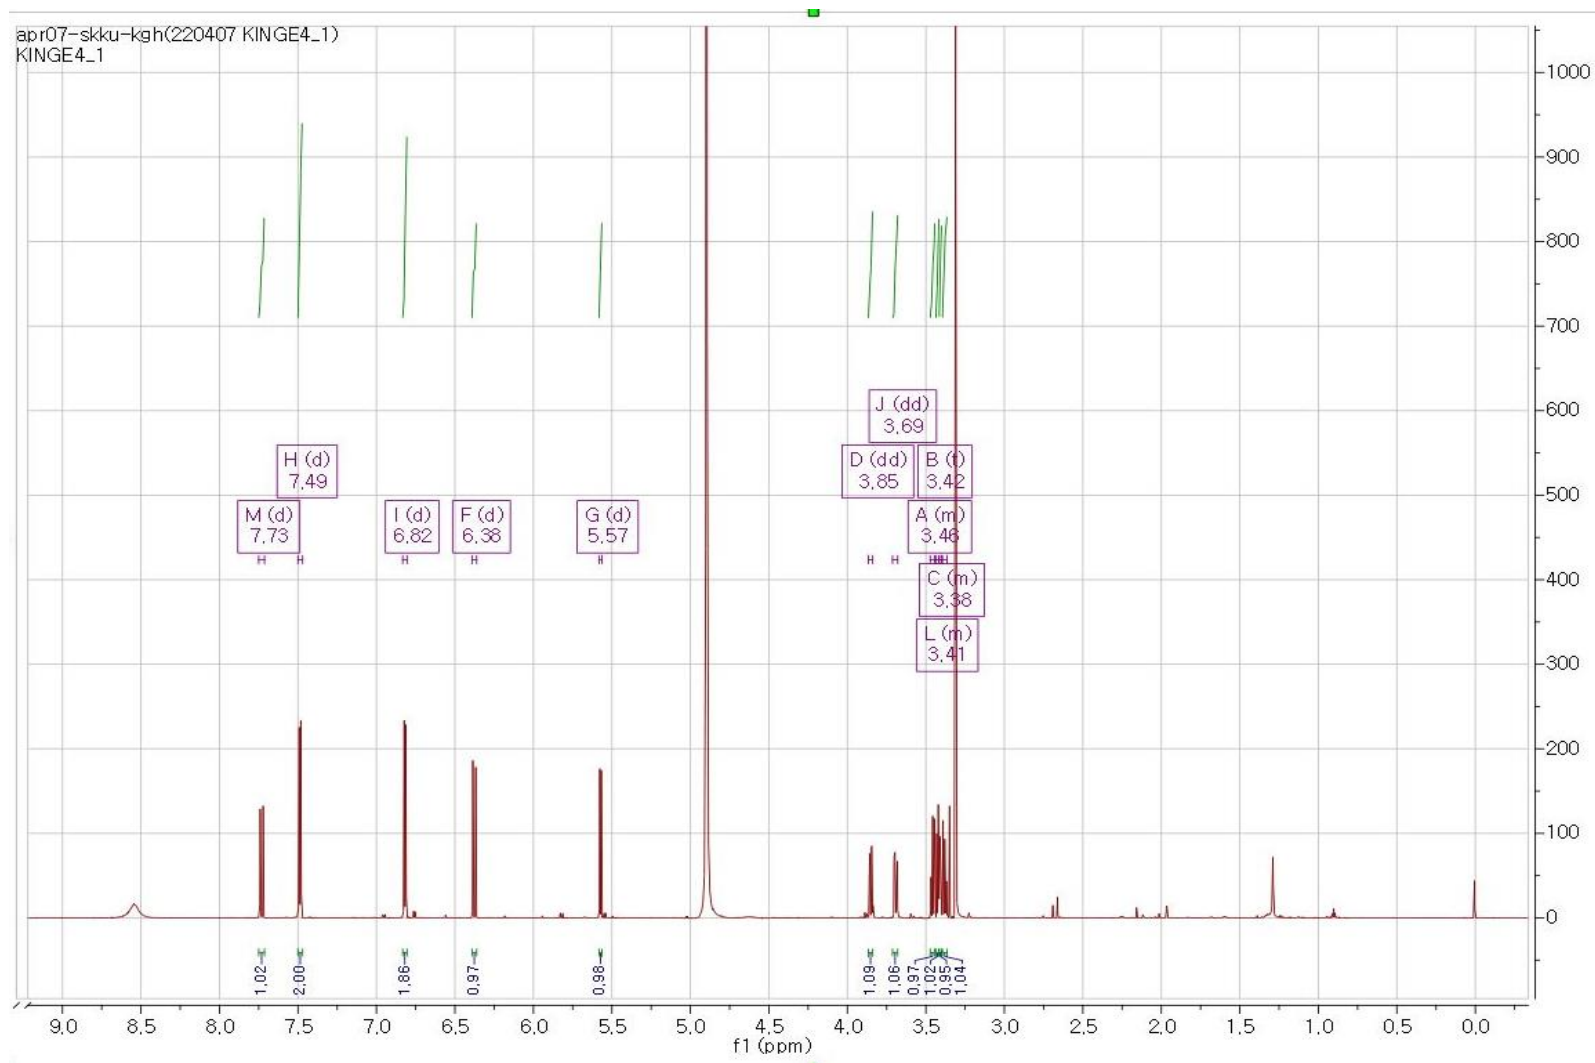

**Figure S11.** The LC-UV chromatogram at 210 nm, UV spectrum and negative-ion mode MS data of **6**

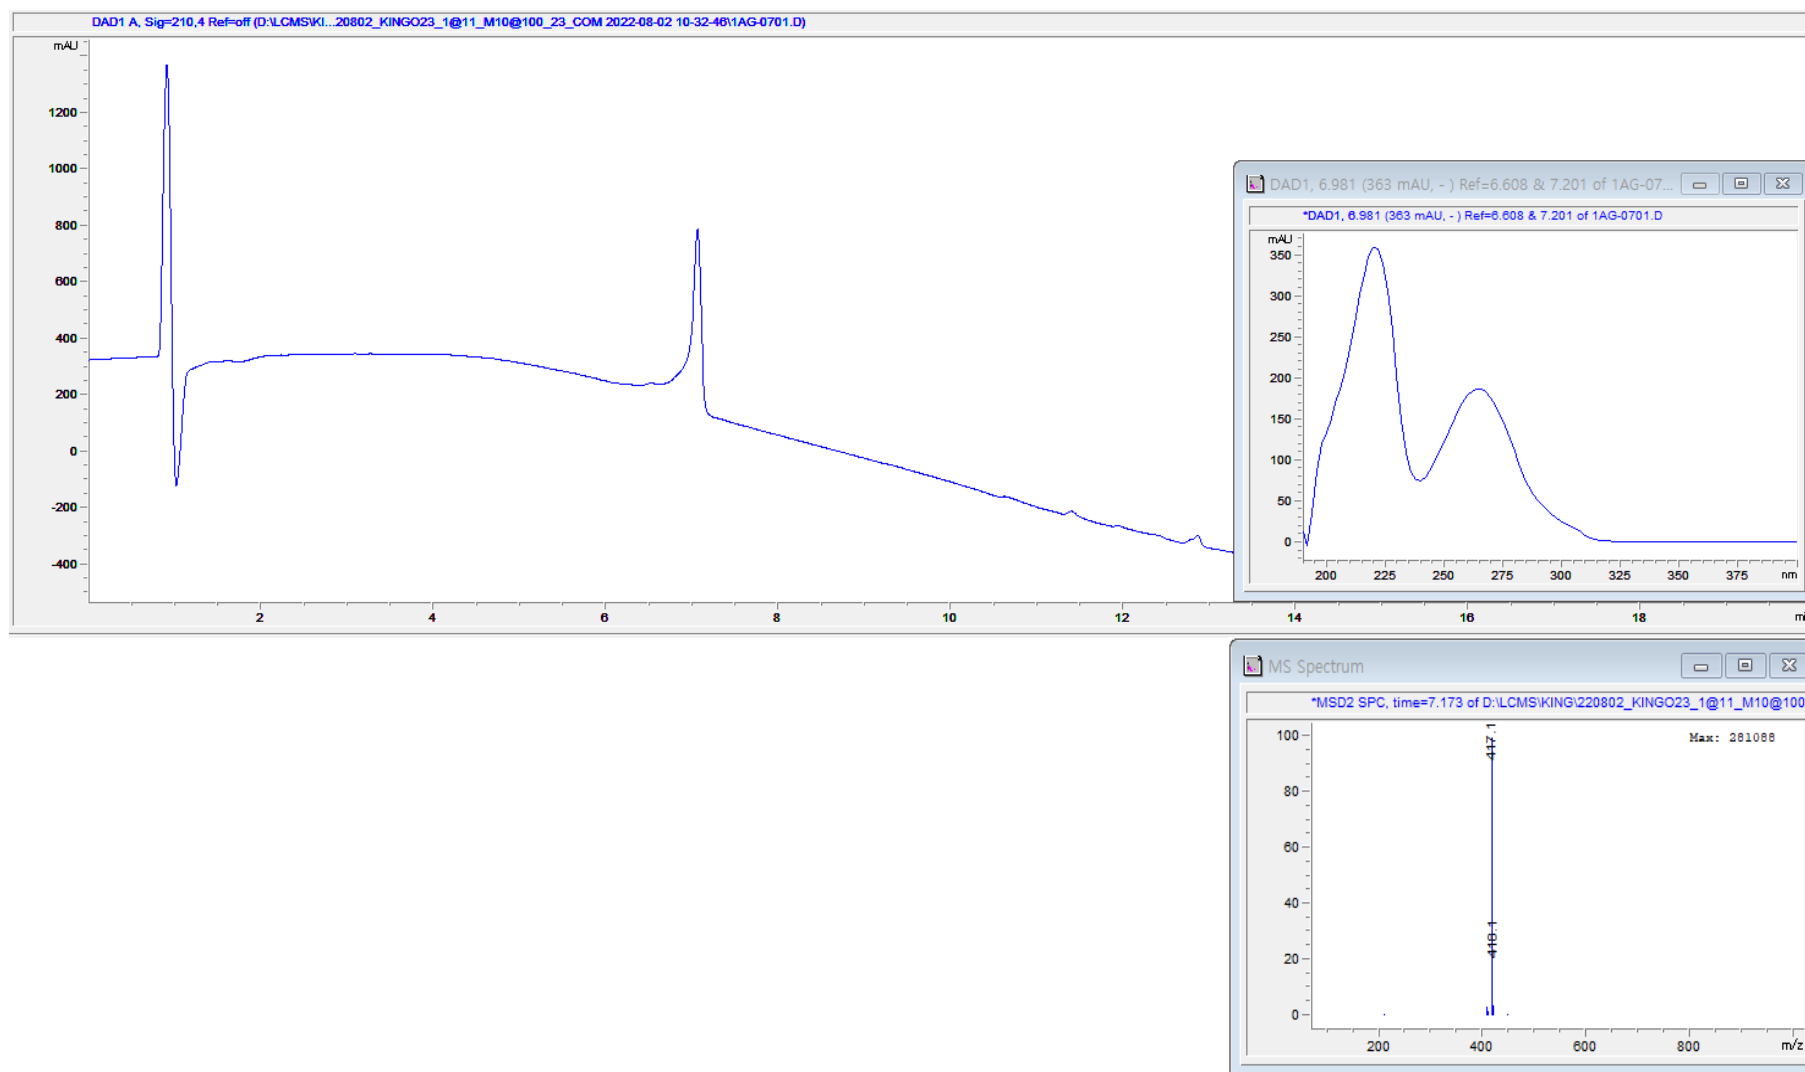

**Figure S12.** The  $^1\text{H}$  NMR spectrum of **6** ( $\text{CD}_3\text{OD}$ , 850 MHz)

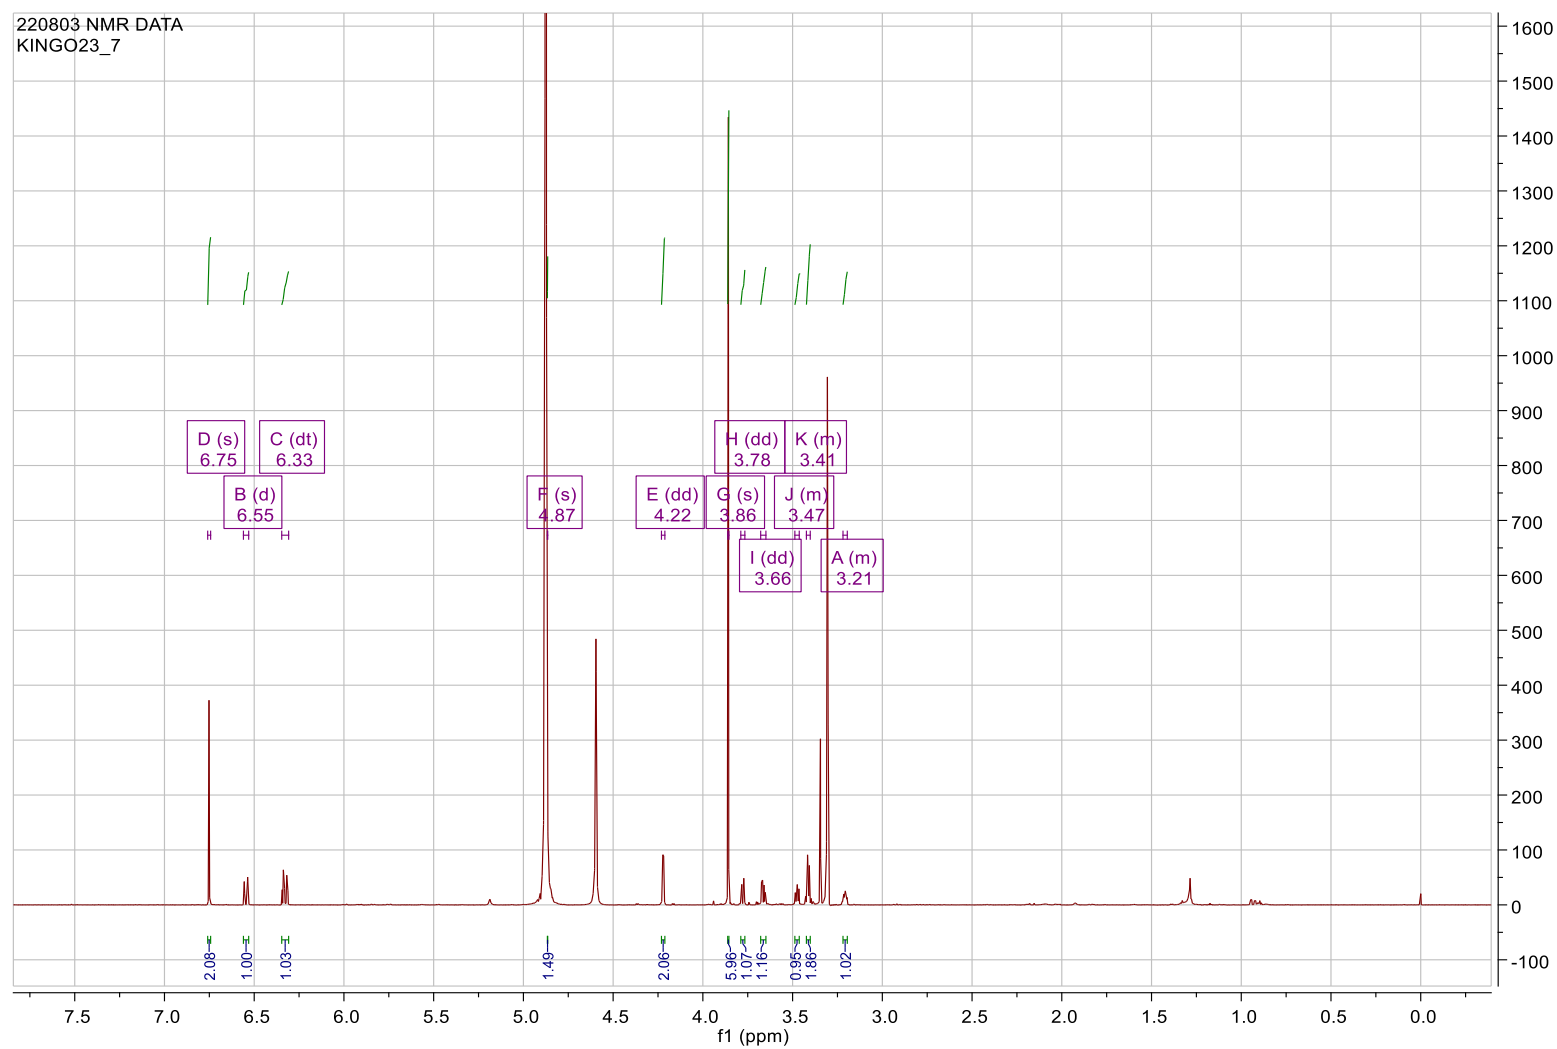

Supplement: s1 [file s1]
